# Supplementary material for: Gender differences in murine pulmonary responses elicited by cellulose nanocrystals
Source: PubMed Central journal article supplement (PMC4898310; doi:10.1186/s12989-016-0140-x), 2016-06-08
Supplement: 12989_2016_140_MOESM6_ESM.pdf [file 12989_2016_140_MOESM6_ESM.pdf]

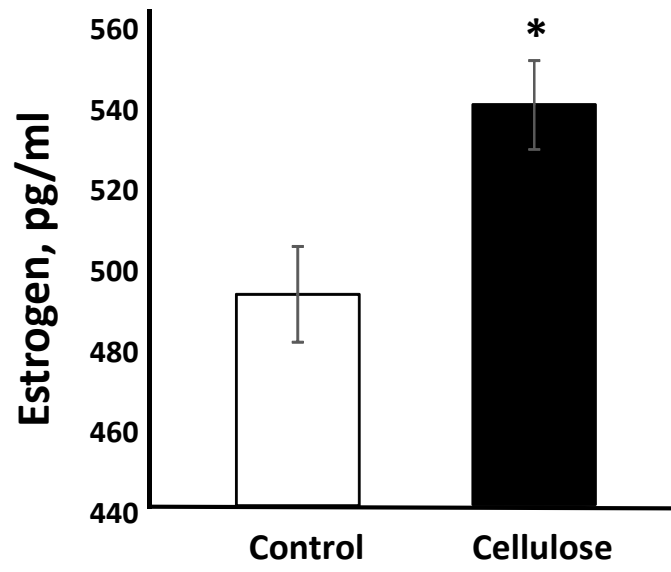

Fig.S1.
